# Supplementary material for: The Ants (Hymenoptera, Formicidae) of Sri Lanka: a taxonomic research summary and updated checklist
Source: Zookeys. 2020 Sep 14;967:1–142. doi: 10.3897/zookeys.967.54432 (PMC7508952; doi:10.3897/zookeys.967.54432)
Supplement: Supplementary material 1 — Ant diversity across three zones of Sri Lanka, endemics, invasive species, and dubious taxa [file zookeys-967-001-s001.xlsx]

## Sheet: Diversity
Amblyoponinae (3 species)	Myopopone (1)	Myopopone castanea (Smith, 1860)	Aneuretinae (1 species)	Aneuretus (1)	Aneuretus simoni Emery, 1893	Dolichoderinae (14 species/subspecies)	Chronoxenus (1)	Chronoxenus wroughtonii (Forel, 1895)	Dorylinae (18 species)	Aenictus (7)	Aenictus aitkenii Forel, 1901	Ectatomminae (2 species)	Gnamptogenys (2)	Gnamptogenys coxalis (Smith, 1857)	Formicinae (102 species)	Acropyga (2)	Acropyga acutiventris Roger, 1862	Leptanillinae (3 species)	Leptanilla (1)	Leptanilla besucheti Baroni Urbani, 1977	Myrmicinae (138 species)	Acanthomyrmex (1)	Acanthomyrmex luciolae Emery, 1893	Ponerinae (54 species)	Anochetus (8)	Anochetus consultans (Walker, 1859)	Proceratiinae (1 species)	Discothyrea (1 species)	Discothyrea sp	Pseudomyrmecinae (4 species)	Tetraponera (4)	Tetraponera allaborans (Walker, 1859)
Aneuretinae (1 species)	Prionopelta (1)	Prionopelta kraepelini Forel, 1905					Dolichoderus (3)	Dolichoderus taprobanae (Smith, 1858)		Dorylus (2)	Aenictus biroi Forel, 1907			Gnamptogenys sinhala Lattke, 2016		Anoplolepis (1)	Acropyga rubescens Forel, 1894		Protanilla (1)	Protanilla schoedli Baroni Urbani & De Andrade, 2006		Anillomyrma (1)	Anillomyrma decamera (Emery, 1901)		Bothroponera (3)	Anochetus graeffei Mayr, 1870						Tetraponera nigra (Jerdon, 1851)
Dolichoderinae (14 species/subspecies)	Stigmatomma (1)	Stigmatomma bellii (Forel, 1900)					Iridomyrmex (1)	Dolichoderus taprobanae gracilipes (Mayr, 1879)		Lioponera (2)	Aenictus ceylonicus (Mayr, 1866)					Camponotus (41)	Anoplolepis gracilipes (Smith, 1857)		Yavnella (1)	Yavnella sp.		Aphaenogaster (1)	Aphaenogaster beccarii Emery, 1887		Brachyponera (3)	Anochetus longifossatus Mayr, 1897						Tetraponera nitida (Smith, 1860)
Dorylinae (19 species)							Ochetellus (1)	Dolichoderus thoracicus (Smith, 1860)		Ooceraea (4)	Aenictus fergusoni Forel, 1901					Colobopsis (2)	Camponotus albipes Emery, 1893					Calyptomyrmex (3)	Calyptomyrmex singalensis Baroni Urbani, 1975		Centromyrmex (2)	Anochetus madaraszi Mayr, 1897						Tetraponera rufonigra (Jerdon, 1851)
Ectatomminae (2 species)							Tapinoma (3)	Iridomyrmex anceps (Roger, 1863)		Parasyscia (3)	Aenictus gracilis Emery, 1893					Lepisiota (7)	Camponotus angusticollis (Jerdon, 1851)					Cardiocondyla (5)	Calyptomyrmex tamil Baroni Urbani, 1975		Cryptopone (1)	Anochetus nietneri (Roger, 1861)
Formicinae (102 species)							Technomyrmex (5)	Ochetellus glaber (Mayr, 1862)		Syscia (1)	Aenictus pachycerus (Smith, 1858)					Myrmoteras (1)	Camponotus auriculatus Mayr, 1897					Carebara (12)	Calyptomyrmex vedda Baroni Urbani, 1975		Diacamma (6)	Anochetus obscurior Brown, 1978
Leptanillinae (3 species)								Tapinoma annandalei (Wheeler, 1928)			Aenictus porizonoides Walker, 1860					Nylanderia (7)	Camponotus barbatus Roger, 1863					Cataulacus (4)	Cardiocondyla emeryi Forel, 1881		Harpegnathos (3)	Anochetus pangens (Walker, 1859)
Myrmicinae (138 species/subspecies)								Tapinoma indicum Forel, 1895			Dorylus labiatus Shuckard, 1840					Oecophylla (1)	Camponotus barbatus infuscoides Bingham, 1903					Crematogaster (21)	Cardiocondyla itsukii Seifert, Okita & Heinze, 2017		Hypoponera (8)	Anochetus yerburyi Forel, 1900
Ponerinae (54 species/subspecies)								Tapinoma melanocephalum (Fabricius, 1793)			Dorylus orientalis Westwood, 1835					Paratrechina (1)	Camponotus barbatus taylori Forel, 1892					Dilobocondyla (1)	Cardiocondyla kagutsuchi Terayama, 1999		Leptogenys (11)	Bothroponera rubiginosa (Emery, 1889)
Proceratiinae (1 species)								Technomyrmex albipes (Smith, 1861)			Lioponera longitarsus Mayr, 1879					Plagiolepis (3)	Camponotus carin Emery, 1889					Erromyrma (1)	Cardiocondyla minutior Forel, 1899		Mesoponera (1)	Bothroponera sulcata (Mayr, 1867)
Pseudomyrmecinae (4 species)								Technomyrmex bicolor Emery, 1893			Lioponera parva Forel, 1900					Polyrhachis (34)	Camponotus compressus (Fabricius, 1787)					Lophomyrmex (3)	Cardiocondyla wroughtonii (Forel, 1890)		Myopias (1)	Bothroponera tesseronoda (Emery, 1877)
								Technomyrmex brunneus Forel, 1895			Ooceraea alii (Bharti & Akbar, 2013)					Prenolepis (1)	Camponotus fletcheri Donisthorpe, 1942					Meranoplus (5)	Carebara affinis (Jerdon, 1851)		Odontomachus (1)	Brachyponera jerdonii (Forel, 1900)
								Technomyrmex elatior Forel, 1902			Ooceraea biroi (Forel, 1907)					Pseudolasius (1)	Camponotus greeni Forel, 1911					Metapone (1)	Carebara bruni (Forel, 1913)		Parvaponera (1)	Brachyponera luteipes (Mayr, 1862)
								Technomyrmex horni Forel, 1912			Ooceraea coeca Mayr, 1897						Camponotus indeflexus (Walker, 1859)					Monomorium (6)	Carebara butteli (Forel, 1913)		Platythyrea (2)	Brachyponera obscurans (Walker, 1859)
											Ooceraea fragosa Roger, 1862						Camponotus irritans (Smith, 1857)					Myrmecina (1)	Carebara ceylonensis (Forel, 1911)		Pseudoneoponera (3)	Centromyrmex feae (Emery, 1889)
											Parasyscia aitkenii (Forel, 1900)						Camponotus isabellae Forel, 1909					Myrmicaria (2)	Carebara deponens (Walker, 1859)			Centromyrmex feae ceylonicus Forel, 1900
											Parasyscia fossulata (Forel, 1895)						Camponotus latebrosus (Walker, 1859)					Paratopula (1)	Carebara diversa (Jerdon, 1851)			Cryptopone testacea Emery, 1893
											Parasyscia luteoviger (Brown, 1975)						Camponotus mendax Forel, 1895					Pheidole (27)	Carebara diversa taprobanae (Smith, 1858)			Diacamma ceylonense Emery, 1897
											Syscia typhla Roger, 1861						Camponotus mendax integer Forel, 1895					Pristomyrmex (2)	Carebara escherichi (Forel, 1911)			Diacamma cyaneiventre André, 1887
																	Camponotus mitis (Smith, 1858)					Recurvidris (2)	Carebara nana (Roger, 1863)			Diacamma indicum Santschi, 1920
																	Camponotus oblongus (Smith, 1858)					Rhopalomastix (2)	Carebara pygmaea (Emery, 1887)			Diacamma rugosum (Le Guillou, 1842)
																	Camponotus ominosus Forel, 1911					Solenopsis (2)	Carebara silenus (Smith, 1858)			Diacamma rugosum jerdoni Forel, 1903
																	Camponotus opaciventris Mayr, 1879					Stereomyrmex (1)	Carebara sinhala Fischer, Azorsa & Fisher, 2014			Diacamma rugosum sculptum (Jerdon, 1851)
																	Camponotus parius Emery, 1889					Strumigenys (6)	Cataulacus granulatus (Latreille, 1802)			Harpegnathos saltator Jerdon, 1851
																	Camponotus reticulatus Roger, 1863					Syllophopsis (1)	Cataulacus latus Forel, 1891			Harpegnathos saltator cruentatus (Smith, 1858)
																	Camponotus reticulatus latitans Forel, 1893					Tetramorium (16)	Cataulacus simoni Emery, 1893			Harpegnathos saltator taprobanae Forel, 1909
																	Camponotus reticulatus yerburyi Forel, 1893					Trichomyrmex (8)	Cataulacus taprobanae Smith, 1853			Hypoponera aitkenii (Forel, 1900)
																	Camponotus rufoglaucus (Jerdon, 1851)					Tyrannomyrmex (1)	Crematogaster anthracina Smith, 1857			Hypoponera bugnioni (Forel, 1912)
																	Camponotus sericeus (Fabricius, 1798)					Vollenhovia (1)	Crematogaster apicalis Motschoulsky, 1863			Hypoponera ceylonensis (Mayr, 1897)
																	Camponotus sesquipedalis Roger, 1863						Crematogaster biroi Mayr, 1897			Hypoponera confinis (Roger, 1860)
																	Camponotus simoni Emery, 1893						Crematogaster brunnea Smith, 1857			Hypoponera punctatissima (Roger, 1859)
																	Camponotus sklarus Bolton, 1995						Crematogaster brunnea nicevillei Emery, 1922			Hypoponera ragusai (Emery, 1894)
																	Camponotus thraso Forel, 1893						Crematogaster brunnea rabula Forel, 1902			Hypoponera taprobanae (Forel, 1913)
																	Camponotus thraso diogenes Forel, 1909						Crematogaster brunnescens Motschoulsky, 1863			Hypoponera wroughtonii (Forel, 1900)
																	Camponotus varians Roger, 1863						Crematogaster consternens (Walker, 1859)			Leptogenys chinensis (Mayr, 1870)
																	Camponotus variegatus (Smith, 1858)						Crematogaster contemta Mayr, 1879			Leptogenys diminuta (Smith, 1857)
																	Camponotus variegatus bacchus (Smith, 1858)						Crematogaster desecta Forel, 1911			Leptogenys diminuta laeviceps (Smith, 1857)
																	Camponotus variegatus crassinodis Forel, 1892						Crematogaster dohrni Mayr, 1879			Leptogenys exundans (Walker, 1859)
																	Camponotus variegatus dulcis Dalla Torre, 1893						Crematogaster dohrni gigas Forel, 1913			Leptogenys falcigera Roger, 1861
																	Camponotus variegatus fuscithorax Dalla Torre, 1893						Crematogaster pellens Walker, 1859			Leptogenys hysterica Forel, 1900
																	Camponotus variegatus infuscus Forel, 1892						Crematogaster ransonneti Mayr, 1868			Leptogenys meritans (Walker, 1859)
																	Camponotus variegatus intrans Forel, 1911						Crematogaster rogenhoferi Mayr, 1879			Leptogenys peuqueti (André, 1887)
																	Camponotus variegatus somnificus Forel, 1902						Crematogaster rogenhoferi lutea Emery, 1893			Leptogenys processionalis (Jerdon, 1851)
																	Camponotus wedda Forel, 1908						Crematogaster rogeri Emery, 1922			Leptogenys pruinosa Forel, 1900
																	Colobopsis badia (Smith, 1857)						Crematogaster rothneyi Mayr, 1879			Leptogenys yerburyi Forel, 1900
																	Colobopsis ceylonica (Emery, 1925)						Crematogaster rothneyi haputalensis Forel, 1913			Mesoponera melanaria (Emery, 1893)
																	Lepisiota capensis (Mayr, 1862)						Crematogaster subnuda Mayr, 1879			Myopias amblyops Roger, 1861
																	Lepisiota fergusoni (Forel, 1895)						Crematogaster walshi Forel, 1902			Odontomachus simillimus Smith, 1858
																	Lepisiota frauenfeldi (Mayr, 1855)						Dilobocondyla didita (Walker, 1859)			Parvaponera darwinii (Forel, 1893)
																	Lepisiota lunaris (Emery, 1893)						Erromyrma latinodis (Mayr, 1872)			Platythyrea clypeata Forel, 1911
																	Lepisiota opaca (Forel, 1892)						Lophomyrmex bedoti Emery, 1893			Platythyrea parallela (Smith, 1859)
																	Lepisiota pulchella (Forel, 1892)						Lophomyrmex birmanus Emery, 1893			Pseudoneoponera insularis (Emery, 1889)
																	Lepisiota rothneyi wroughtonii (Forel, 1902)						Lophomyrmex quadrispinosus (Jerdon, 1851)			Pseudoneoponera rufipes (Jerdon, 1851)
																	Myrmoteras ceylonicum Gregg, 1957						Meranoplus bicolor (Guerin-Meneville, 1844)			Pseudoneoponera rufipes ceylonensis (Forel, 1911)
																	Nylanderia bourbonica (Forel, 1886)						Meranoplus boltoni Schödl, 1998
																	Nylanderia indica (Forel, 1894)						Meranoplus levis Donisthorpe, 1942
																	Nylanderia taylori (Forel, 1894)						Meranoplus loebli Schödl, 1998
																	Nylanderia taylori levis (Forel, 1913)						Meranoplus rothneyi Forel, 1902
																	Nylanderia vagabunda (Motschoulsky, 1863)						Metapone greeni Forel, 1911
																	Nylanderia vividula (Nylander, 1846)						Monomorium dichroum Forel, 1902
																	Nylanderia yerburyi (Forel, 1894)						Monomorium floricola (Jerdon, 1851)
																	Oecophylla smaragdina (Fabricius, 1775)						Monomorium monomorium Bolton, 1987
																	Paratrechina longicornis (Latreille, 1802)						Monomorium pharaonis (Linnaeus, 1758)
																	Plagiolepis exigua Forel, 1894						Monomorium subopacum (Smith, 1858)
																	Plagiolepis jerdonii Forel, 1894						Monomorium taprobanae Forel, 1913
																	Plagiolepis pissina Roger, 1863						Myrmecina striata Emery, 1889
																	Polyrhachis aculeata Mayr, 1879						Myrmicaria brunnea Saunders, 1842
																	Polyrhachis aedipus Forel, 1893						Myrmicaria fodiens (Jerdon, 1851)
																	Polyrhachis bugnioni Forel, 1908						Paratopula ceylonica (Emery, 1901)
																	Polyrhachis convexa Roger, 1863						Pheidole barreleti Forel, 1903
																	Polyrhachis convexa isabellae Forel, 1908						Pheidole ceylonica (Motschoulsky, 1863)
																	Polyrhachis curvispina Forel, 1908						Pheidole diffidens (Walker, 1859)
																	Polyrhachis dives Smith, 1857						Pheidole fergusoni Forel, 1902
																	Polyrhachis dives belli Forel, 1912						Pheidole fervens Smith, 1858
																	Polyrhachis exercita (Walker, 1859)						Pheidole gracilipes (Motschoulsky, 1863)
																	Polyrhachis fornicata Emery, 1900						Pheidole horni Emery, 1901
																	Polyrhachis frauenfeldi Mayr, 1862						Pheidole indica Mayr, 1879
																	Polyrhachis gibbosa Forel, 1908						Pheidole jucunda Forel, 1885
																	Polyrhachis hippomanes ceylonensis Emery, 1893						Pheidole latinoda Roger, 1863
																	Polyrhachis horni Emery, 1901						Pheidole latinoda peradeniyae Forel, 1911
																	Polyrhachis illaudata Walker, 1859						Pheidole malinsii Forel, 1902
																	Polyrhachis jerdonii Forel, 1892						Pheidole megacephala (Fabricius, 1793)
																	Polyrhachis lacteipennis Smith, 1858						Pheidole nietneri Emery, 1901
																	Polyrhachis nigra Mayr, 1862						Pheidole nodus Smith, 1874
																	Polyrhachis proxima Roger, 1863						Pheidole parva Mayr, 1865
																	Polyrhachis punctillata Roger, 1863						Pheidole pronotalis Forel, 1902
																	Polyrhachis rastellata (Latreille, 1802)						Pheidole rogersi taylori Forel, 1902
																	Polyrhachis rupicapra Roger, 1863						Pheidole rugosa Smith, 1858
																	Polyrhachis saevissima argentea Mayr, 1862						Pheidole sharpi Forel, 1902
																	Polyrhachis scissa (Roger, 1862)						Pheidole spathifera Forel, 1902
																	Polyrhachis sophocles Forel, 1908						Pheidole spathifera yerburyi Forel, 1902
																	Polyrhachis thrinax Roger, 1863						Pheidole sulcaticeps Roger, 1863
																	Polyrhachis thrinax lancearia Forel, 1893						Pheidole sulcaticeps vellicans Forel, 1911
																	Polyrhachis tibialis Smith, 1858						Pheidole templaria euscrobata Forel, 1913
																	Polyrhachis tibialis parsis Emery, 1900						Pheidole watsoni Forel, 1902
																	Polyrhachis tibialis pectita Santschi, 1928						Pheidole woodmasoni Forel, 1885
																	Polyrhachis tubericeps Forel, 1893						Pristomyrmex punctatus (Smith, 1860)
																	Polyrhachis wroughtonii Forel, 1894						Pristomyrmex sinharaja Dias & Yamane, 2016
																	Polyrhachis xanthippe Forel, 1911						Recurvidris pickburni Bolton, 1992
																	Polyrhachis yerburyi Forel, 1893						Recurvidris recurvispinosa (Forel, 1890)
																	Prenolepis naoroji Forel, 1902						Rhopalomastix escherichi Forel, 1911
																	Pseudolasius isabellae Forel, 1908						Rhopalomastix rothneyi Forel, 1900
																							Solenopsis geminata (Fabricius, 1804)
																							Solenopsis nitens Bingham, 1903
																							Stereomyrmex horni Emery, 1901
																							Strumigenys emmae (Emery, 1890)
																							Strumigenys godeffroyi Mayr, 1866
																							Strumigenys inopinata (De Andrade, 1994)
																							Strumigenys lyroessa (Roger, 1862)
																							Strumigenys membranifera Emery, 1869
																							Strumigenys veddha De Andrade, 2007
																							Syllophopsis australica (Forel, 1907)
																							Tetramorium bicarinatum (Nylander, 1846)
																							Tetramorium curvispinosum Mayr, 1897
																							Tetramorium indicum Forel, 1913
																							Tetramorium insolens (Smith, 1861)
																							Tetramorium lanuginosum Mayr, 1870
																							Tetramorium mayri (Forel, 1912)
																							Tetramorium obesum André, 1887
																							Tetramorium pacificum Mayr, 1870
																							Tetramorium pilosum Emery, 1893
																							Tetramorium simillimum (Smith, 1851)
																							Tetramorium smithi Mayr, 1879
																							Tetramorium tonganum Mayr, 1870
																							Tetramorium tortuosum Roger, 1863
																							Tetramorium transversarium Roger, 1863
																							Tetramorium walshi (Forel, 1890)
																							Tetramorium yerburyi Forel, 1902
																							Trichomyrmex aberrans (Forel, 1902)
																							Trichomyrmex criniceps (Mayr, 1879)
																							Trichomyrmex destructor (Jerdon, 1851)
																							Trichomyrmex emeryi laevior (Mayr, 1897)
																							Trichomyrmex glaber (André, 1883)
																							Trichomyrmex mayri (Forel, 1902)
																							Trichomyrmex rogeri Mayr, 1865
																							Trichomyrmex wroughtoni Forel, 1911
																							Tyrannomyrmex legatus Alpert, 2013
																							Vollenhovia escherichi Forel, 1911

## Sheet: Ants Across Zones
Species	Wet Zone	Dry Zone	Intermediate Zone
Myopopone castanea (Smith, 1860)	1	1	0
Prionopelta kraepelini Forel, 1905	1	0	0
Stigmatomma bellii (Forel, 1900)	0	1	0
Aneuretus simoni Emery, 1893	1	0	1
Chronoxenus wroughtonii (Forel, 1895)	1	0	0
Dolichoderus taprobanae (Smith, 1858)	1	0	0
Dolichoderus taprobanae gracilipes (Mayr, 1879)	0	0	0
Dolichoderus thoracicus (Smith, 1860)	1	0	0
Iridomyrmex anceps (Roger, 1863)	0	0	0
Ochetellus glaber (Mayr, 1862)	0	0	0
Tapinoma annandalei (Wheeler, 1928)	0	1	0
Tapinoma indicum Forel, 1895	1	1	1
Tapinoma melanocephalum (Fabricius, 1793)	1	1	1
Technomyrmex albipes (Smith, 1861)	1	1	1
Technomyrmex bicolor Emery, 1893	1	1	1
Technomyrmex brunneus Forel, 1895	1	1	0
Technomyrmex elatior Forel, 1902	1	0	0
Technomyrmex horni Forel, 1912	1	0	0
Aenictus aitkenii Forel, 1901	1	0	0
Aenictus biroi Forel, 1907	1	0	0
Aenictus ceylonicus (Mayr, 1866)	0	0	0
Aenictus fergusoni Forel, 1901	1	1	0
Aenictus gracilis Emery, 1893	1	0	0
Aenictus pachycerus (Smith, 1858)	1	1	0
Aenictus porizonoides Walker, 1860	1	0	0
Dorylus labiatus Shuckard, 1840	1	1	0
Dorylus orientalis Westwood, 1835	1	1	0
Lioponera longitarsus Mayr, 1879	0	0	1
Lioponera parva Forel, 1900	0	0	0
Ooceraea alii (Bharti & Akbar, 2013)	0	1	0
Ooceraea biroi (Forel, 1907)	1	0	0
Ooceraea coeca Mayr, 1897	0	1	0
Ooceraea fragosa Roger, 1862	1	1	1
Parasyscia aitkenii (Forel, 1900)	0	0	1
Parasyscia fossulata (Forel, 1895)	1	0	1
Parasyscia luteoviger (Brown, 1975)	1	0	0
Syscia typhla Roger, 1861	1	1	1
Gnamptogenys coxalis (Smith, 1857)	0	0	0
Gnamptogenys sinhala Lattke, 2016	0	0	0
Acropyga acutiventris Roger, 1862	1	1	0
Acropyga rubescens Forel, 1894	1	0	0
Anoplolepis gracilipes (Smith, 1857)	1	1	1
Camponotus albipes Emery, 1893	1	0	0
Camponotus angusticollis (Jerdon, 1851)	1	0	0
Camponotus auriculatus Mayr, 1897	0	0	0
Camponotus barbatus Roger, 1863	1	0	0
Camponotus barbatus infuscoides Bingham, 1903	0	0	0
Camponotus barbatus taylori Forel, 1892	1	0	0
Camponotus carin Emery, 1889	0	0	0
Camponotus compressus (Fabricius, 1787)	1	1	1
Camponotus fletcheri Donisthorpe, 1942	0	1	0
Camponotus greeni Forel, 1911	0	0	1
Camponotus indeflexus (Walker, 1859)	0	0	0
Camponotus irritans (Smith, 1857)	1	1	1
Camponotus isabellae Forel, 1909	1	0	0
Camponotus latebrosus (Walker, 1859)	0	0	0
Camponotus mendax Forel, 1895	0	0	0
Camponotus mendax integer Forel, 1895	1	0	0
Camponotus mitis (Smith, 1858)	1	0	0
Camponotus oblongus (Smith, 1858)	1	1	0
Camponotus ominosus Forel, 1911	0	0	1
Camponotus opaciventris Mayr, 1879	1	1	0
Camponotus parius Emery, 1889	1	0	0
Camponotus reticulatus Roger, 1863	0	1	1
Camponotus reticulatus latitans Forel, 1893	1	0	0
Camponotus reticulatus yerburyi Forel, 1893	1	0	0
Camponotus rufoglaucus (Jerdon, 1851)	1	1	1
Camponotus sericeus (Fabricius, 1798)	1	1	1
Camponotus sesquipedalis Roger, 1863	0	0	0
Camponotus simoni Emery, 1893	1	0	0
Camponotus sklarus Bolton, 1995	1	0	0
Camponotus thraso Forel, 1893	0	1	0
Camponotus thraso diogenes Forel, 1909	1	0	0
Camponotus varians Roger, 1863	1	0	1
Camponotus variegatus (Smith, 1858)	1	1	1
Camponotus variegatus bacchus (Smith, 1858)	1	0	1
Camponotus variegatus crassinodis Forel, 1892	1	0	0
Camponotus variegatus dulcis Dalla Torre, 1893	0	0	0
Camponotus variegatus fuscithorax Dalla Torre, 1893	1	0	0
Camponotus variegatus infuscus Forel, 1892	1	0	1
Camponotus variegatus intrans Forel, 1911	0	0	1
Camponotus variegatus somnificus Forel, 1902	1	0	1
Camponotus wedda Forel, 1908	1	0	0
Colobopsis badia (Smith, 1857)	0	0	0
Colobopsis ceylonica (Emery, 1925)	0	0	0
Lepisiota capensis (Mayr, 1862)	0	1	1
Lepisiota fergusoni (Forel, 1895)	1	1	0
Lepisiota frauenfeldi (Mayr, 1855)	1	1	0
Lepisiota lunaris (Emery, 1893)	1	0	0
Lepisiota opaca (Forel, 1892)	0	1	0
Lepisiota pulchella (Forel, 1892)	0	1	0
Lepisiota rothneyi wroughtonii (Forel, 1902)	1	0	0
Myrmoteras ceylonicum Gregg, 1957	1	0	0
Nylanderia bourbonica (Forel, 1886)	1	0	0
Nylanderia indica (Forel, 1894)	1	1	0
Nylanderia taylori (Forel, 1894)	0	1	0
Nylanderia taylori levis (Forel, 1913)	1	0	0
Nylanderia vagabunda (Motschoulsky, 1863)	0	0	0
Nylanderia vividula (Nylander, 1846)	0	0	0
Nylanderia yerburyi (Forel, 1894)	1	1	1
Oecophylla smaragdina (Fabricius, 1775)	1	1	1
Paratrechina longicornis (Latreille, 1802)	1	1	1
Plagiolepis exigua Forel, 1894	0	1	0
Plagiolepis jerdonii Forel, 1894	0	1	0
Plagiolepis pissina Roger, 1863	0	0	0
Polyrhachis aculeata Mayr, 1879	0	0	0
Polyrhachis bugnioni Forel, 1908	1	0	0
Polyrhachis convexa Roger, 1863	1	1	0
Polyrhachis convexa isabellae Forel, 1908	1	0	0
Polyrhachis curvispina Forel, 1908	1	0	0
Polyrhachis dives Smith, 1857	0	0	0
Polyrhachis dives belli Forel, 1912	0	0	0
Polyrhachis exercita (Walker, 1859)	1	0	0
Polyrhachis fornicata Emery, 1900	1	0	0
Polyrhachis frauenfeldi Mayr, 1862	0	0	0
Polyrhachis gibbosa Forel, 1908	1	0	0
Polyrhachis hippomanes ceylonensis Emery, 1893	1	0	0
Polyrhachis horni Emery, 1901	1	0	1
Polyrhachis illaudata Walker, 1859	1	0	0
Polyrhachis jerdonii Forel, 1892	1	1	0
Polyrhachis lacteipennis Smith, 1858	0	0	0
Polyrhachis nigra Mayr, 1862	0	0	0
Polyrhachis oedipus Forel, 1893	1	0	0
Polyrhachis proxima Roger, 1863	0	0	0
Polyrhachis punctillata Roger, 1863	0	1	1
Polyrhachis rastellata (Latreille, 1802)	1	0	0
Polyrhachis rupicapra Roger, 1863	1	0	0
Polyrhachis saevissima argentea Mayr, 1862	1	0	0
Polyrhachis scissa (Roger, 1862)	1	1	1
Polyrhachis sophocles Forel, 1908	0	0	0
Polyrhachis thrinax Roger, 1863	1	0	0
Polyrhachis thrinax lancearia Forel, 1893	0	0	0
Polyrhachis tibialis Smith, 1858	0	0	0
Polyrhachis tibialis parsis Emery, 1900	1	0	0
Polyrhachis tibialis pectita Santschi, 1928	1	0	0
Polyrhachis tubericeps Forel, 1893	0	0	0
Polyrhachis wroughtonii Forel, 1894	0	0	0
Polyrhachis xanthippe Forel, 1911	0	0	1
Polyrhachis yerburyi Forel, 1893	1	0	0
Prenolepis naoroji Forel, 1902	1	0	1
Pseudolasius isabellae Forel, 1908	1	1	0
Leptanilla besucheti Baroni Urbani, 1977	1	0	0
Protanilla schoedli Baroni Urbani & De Andrade, 2006	1	1	0
Yavnella sp.	1	0	0
Acanthomyrmex luciolae Emery, 1893	1	0	0
Anillomyrma decamera (Emery, 1901)	0	1	0
Aphaenogaster beccarii Emery, 1887	0	0	0
Calyptomyrmex singalensis Baroni Urbani, 1975	0	1	0
Calyptomyrmex tamil Baroni Urbani, 1975	0	1	0
Calyptomyrmex vedda Baroni Urbani, 1975	0	1	0
Cardiocondyla emeryi Forel, 1881	1	0	0
Cardiocondyla itsukii Seifert, Okita & Heinze, 2017	1	0	0
Cardiocondyla kagutsuchi Terayama, 1999	1	0	0
Cardiocondyla minutior Forel, 1899	1	0	1
Cardiocondyla wroughtonii (Forel, 1890)	1	0	0
Carebara affinis (Jerdon, 1851)	0	0	1
Carebara bruni (Forel, 1913)	1	0	0
Carebara butteli (Forel, 1913)	1	0	0
Carebara ceylonensis (Forel, 1911)	1	0	0
Carebara deponens (Walker, 1859)	0	0	0
Carebara diversa (Jerdon, 1851)	1	0	0
Carebara diversa taprobanae (Smith, 1858)	1	0	0
Carebara escherichi (Forel, 1911)	1	0	0
Carebara nana (Roger, 1863)	1	0	1
Carebara pygmaea (Emery, 1887)	1	0	0
Carebara silenus (Smith, 1858)	0	0	0
Carebara sinhala Fischer, Azorsa & Fisher, 2014	1	0	0
Cataulacus granulatus (Latreille, 1802)	1	0	0
Cataulacus latus Forel, 1891	1	0	0
Cataulacus simoni Emery, 1893	1	1	0
Cataulacus taprobanae Smith, 1853	1	1	0
Crematogaster anthracina Smith, 1857	0	0	0
Crematogaster apicalis Motschoulsky, 1863	1	0	0
Crematogaster biroi Mayr, 1897	1	1	1
Crematogaster brunnea Smith, 1857	0	0	1
Crematogaster brunnea nicevillei Emery, 1922	1	0	0
Crematogaster brunnea rabula Forel, 1902	1	1	0
Crematogaster brunnescens Motschoulsky, 1863	1	0	0
Crematogaster consternens (Walker, 1859)	0	0	0
Crematogaster contemta Mayr, 1879	0	1	0
Crematogaster desecta Forel, 1911	0	0	1
Crematogaster dohrni Mayr, 1879	1	1	0
Crematogaster dohrni gigas Forel, 1913	0	1	0
Crematogaster pellens Walker, 1859	0	0	0
Crematogaster ransonneti Mayr, 1868	1	0	0
Crematogaster rogenhoferi Mayr, 1879	1	1	0
Crematogaster rogenhoferi lutea Emery, 1893	1	0	0
Crematogaster rogeri Emery, 1922	0	0	0
Crematogaster rothneyi Mayr, 1879	1	1	1
Crematogaster rothneyi haputalensis Forel, 1913	0	0	1
Crematogaster subnuda Mayr, 1879	0	1	0
Crematogaster walshi Forel, 1902	1	0	0
Dilobocondyla didita (Walker, 1859)	1	0	0
Erromyrma latinodis (Mayr, 1872)	1	0	0
Lophomyrmex bedoti Emery, 1893	1	0	0
Lophomyrmex birmanus Emery, 1893	1	0	0
Lophomyrmex quadrispinosus (Jerdon, 1851)	1	1	1
Meranoplus bicolor (Guerin-Meneville, 1844)	1	1	1
Meranoplus boltoni Schödl, 1998	0	0	1
Meranoplus levis Donisthorpe, 1942	0	1	0
Meranoplus loebli Schödl, 1998	1	1	0
Meranoplus rothneyi Forel, 1902	1	0	0
Metapone greeni Forel, 1911	1	0	0
Monomorium dichroum Forel, 1902	1	0	0
Monomorium floricola (Jerdon, 1851)	1	1	1
Monomorium monomorium Bolton, 1987	0	0	0
Monomorium pharaonis (Linnaeus, 1758)	0	1	1
Monomorium subopacum (Smith, 1858)	0	0	0
Monomorium taprobanae Forel, 1913	1	0	0
Myrmecina striata Emery, 1889	1	1	0
Myrmicaria brunnea Saunders, 1842	1	1	0
Myrmicaria fodiens (Jerdon, 1851)	1	0	0
Paratopula ceylonica (Emery, 1901)	1	0	0
Pheidole barreleti Forel, 1903	1	0	0
Pheidole ceylonica (Motschoulsky, 1863)	1	0	0
Pheidole diffidens (Walker, 1859)	0	0	0
Pheidole fergusoni Forel, 1902	0	1	0
Pheidole fervens Smith, 1858	1	0	0
Pheidole gracilipes (Motschoulsky, 1863)	1	0	0
Pheidole horni Emery, 1901	1	0	0
Pheidole indica Mayr, 1879	1	1	0
Pheidole jucunda Forel, 1885	0	0	0
Pheidole latinoda Roger, 1863	1	0	0
Pheidole latinoda peradeniyae Forel, 1911	1	0	0
Pheidole malinsii Forel, 1902	0	0	0
Pheidole megacephala (Fabricius, 1793)	1	1	1
Pheidole nietneri Emery, 1901	1	1	0
Pheidole nodus Smith, 1874	1	1	0
Pheidole parva Mayr, 1865	1	0	1
Pheidole pronotalis Forel, 1902	1	0	0
Pheidole rogersi taylori Forel, 1902	1	0	0
Pheidole rugosa Smith, 1858	0	0	0
Pheidole sharpi Forel, 1902	0	1	0
Pheidole spathifera Forel, 1902	1	0	0
Pheidole spathifera yerburyi Forel, 1902	1	0	0
Pheidole sulcaticeps Roger, 1863	0	1	0
Pheidole sulcaticeps vellicans Forel, 1911	1	0	0
Pheidole templaria euscrobata Forel, 1913	0	0	1
Pheidole watsoni Forel, 1902	0	0	0
Pheidole woodmasoni Forel, 1885	1	0	1
Pristomyrmex punctatus (Smith, 1860)	0	0	0
Pristomyrmex sinharaja Dias & Yamane, 2016	1	0	0
Recurvidris pickburni Bolton, 1992	1	0	0
Recurvidris recurvispinosa (Forel, 1890)	1	1	1
Rhopalomastix escherichi Forel, 1911	1	0	0
Rhopalomastix rothneyi Forel, 1900	1	0	0
Solenopsis geminata (Fabricius, 1804)	1	1	1
Solenopsis nitens Bingham, 1903	1	0	0
Stereomyrmex horni Emery, 1901	1	1	1
Strumigenys emmae (Emery, 1890)	1	0	0
Strumigenys godeffroyi Mayr, 1866	1	0	0
Strumigenys inopinata (De Andrade, 1994)	1	0	0
Strumigenys lyroessa (Roger, 1862)	1	1	0
Strumigenys membranifera Emery, 1869	1	0	0
Strumigenys veddha De Andrade, 2007	0	1	0
Syllophopsis australica (Forel, 1907)	0	0	0
Tetramorium bicarinatum (Nylander, 1846)	1	1	1
Tetramorium curvispinosum Mayr, 1897	1	1	0
Tetramorium indicum Forel, 1913	1	0	0
Tetramorium insolens (Smith, 1861)	1	0	0
Tetramorium lanuginosum Mayr, 1870	1	1	0
Tetramorium mayri (Forel, 1912)	1	0	0
Tetramorium obesum André, 1887	0	1	0
Tetramorium pacificum Mayr, 1870	1	1	1
Tetramorium pilosum Emery, 1893	1	0	0
Tetramorium simillimum (Smith, 1851)	1	0	0
Tetramorium smithi Mayr, 1879	1	1	1
Tetramorium tonganum Mayr, 1870	1	0	0
Tetramorium tortuosum Roger, 1863	1	1	1
Tetramorium transversarium Roger, 1863	1	0	0
Tetramorium walshi (Forel, 1890)	1	1	1
Tetramorium yerburyi Forel, 1902	1	0	0
Trichomyrmex aberrans (Forel, 1902)	0	0	0
Trichomyrmex criniceps (Mayr, 1879)	1	1	0
Trichomyrmex destructor (Jerdon, 1851)	1	1	1
Trichomyrmex emeryi laevior (Mayr, 1897)	0	1	0
Trichomyrmex glaber (André, 1883)	0	1	0
Trichomyrmex mayri (Forel, 1902)	1	0	0
Trichomyrmex rogeri Mayr, 1865	0	0	0
Trichomyrmex wroughtoni Forel, 1911	0	0	0
Tyrannomyrmex legatus Alpert, 2013	1	0	0
Vollenhovia escherichi Forel, 1911	1	0	0
Anochetus consultans (Walker, 1859)	0	0	0
Anochetus graeffei Mayr, 1870	1	1	1
Anochetus longifossatus Mayr, 1897	1	1	1
Anochetus madaraszi Mayr, 1897	0	1	0
Anochetus nietneri (Roger, 1861)	1	1	1
Anochetus obscurior Brown, 1978	1	0	0
Anochetus pangens (Walker, 1859)	0	0	0
Anochetus yerburyi Forel, 1900	0	0	0
Bothroponera rubiginosa (Emery, 1889)	0	1	0
Bothroponera sulcata (Mayr, 1867)	1	0	0
Bothroponera tesseronoda (Emery, 1877)	1	1	1
Brachyponera jerdonii (Forel, 1900)	1	0	0
Brachyponera luteipes (Mayr, 1862)	1	0	0
Brachyponera obscurans (Walker, 1859)	0	0	0
Centromyrmex feae (Emery, 1889)	1	1	0
Centromyrmex feae ceylonicus Forel, 1900	1	0	0
Cryptopone testacea Emery, 1893	1	0	0
Diacamma ceylonense Emery, 1897	1	1	0
Diacamma cyaneiventre André, 1887	0	0	0
Diacamma indicum Santschi, 1920	1	0	0
Diacamma rugosum (Le Guillou, 1842)	1	0	1
Diacamma rugosum jerdoni Forel, 1903	1	0	0
Diacamma rugosum sculptum (Jerdon, 1851)	0	0	0
Harpegnathos saltator Jerdon, 1851	1	1	0
Harpegnathos saltator cruentatus (Smith, 1858)	0	0	0
Harpegnathos saltator taprobanae Forel, 1909	0	1	0
Hypoponera aitkenii (Forel, 1900)	1	0	0
Hypoponera bugnioni (Forel, 1912)	1	0	0
Hypoponera ceylonensis (Mayr, 1897)	0	1	0
Hypoponera confinis (Roger, 1860)	1	0	0
Hypoponera punctatissima (Roger, 1859)	0	0	0
Hypoponera ragusai (Emery, 1894)	1	0	1
Hypoponera taprobanae (Forel, 1913)	1	0	0
Hypoponera wroughtonii (Forel, 1900)	1	0	0
Leptogenys chinensis (Mayr, 1870)	1	1	0
Leptogenys diminuta (Smith, 1857)	1	0	0
Leptogenys diminuta laeviceps (Smith, 1857)	1	0	0
Leptogenys exundans (Walker, 1859)	0	0	0
Leptogenys falcigera Roger, 1861	1	0	0
Leptogenys hysterica Forel, 1900	0	0	0
Leptogenys meritans (Walker, 1859)	0	0	0
Leptogenys peuqueti (André, 1887)	1	1	0
Leptogenys processionalis (Jerdon, 1851)	1	1	1
Leptogenys pruinosa Forel, 1900	1	1	1
Leptogenys yerburyi Forel, 1900	1	0	0
Mesoponera melanaria (Emery, 1893)	1	1	1
Myopias amblyops Roger, 1861	1	0	0
Odontomachus simillimus Smith, 1858	1	1	1
Parvaponera darwinii (Forel, 1893)	1	0	0
Platythyrea clypeata Forel, 1911	0	0	0
Platythyrea parallela (Smith, 1859)	1	1	0
Pseudoneoponera insularis (Emery, 1889)	0	0	0
Pseudoneoponera rufipes (Jerdon, 1851)	1	0	0
Pseudoneoponera rufipes ceylonensis (Forel, 1911)	1	0	0
Discothyrea sp.	1	0	0
Tetraponera allaborans (Walker, 1859)	1	1	1
Tetraponera nigra (Jerdon, 1851)	1	1	0
Tetraponera nitida (Smith, 1860)	1	0	0
Tetraponera rufonigra (Jerdon, 1851)	1	1	1
	231	113	71

## Sheet: Endemic Species
Aneuretinae	Dorylinae	Formicinae	Leptanillinae	Myrmicinae	Ponerinae
1.Aneuretus simoni Emery, 1893	2.Aenictus biroi Forel, 1907	7.Camponotus albipes Emery, 1893	31.Leptanilla besucheti Baroni Urbani, 1977	33.Calyptomyrmex singalensis Baroni Urbani, 1975	74.Anochetus consultans (Walker, 1859)
	3.Ooceraea coeca Mayr, 1897	8.Camponotus auriculatus Mayr, 1897	32.Protanilla schoedli Baroni Urbani and De Andrade, 2006	34.Calyptomyrmex tamil Baroni Urbani, 1975	75.Anochetus longifossatus Mayr, 1897
	4.Ooceraea fragosa Roger, 1862	9.Camponotus fletcheri Donisthorpe, 1942		35.Carebara butteli (Forel, 1913)	76.Anochetus nietneri (Roger, 1861)
	5.Parasyscia luteoviger (Brown, 1975)	10.Camponotus greeni Forel, 1911		36.Carebara ceylonensis (Forel, 1911)	77.Anochetus pangens (Walker, 1859)
	Ectatomminae	11.Camponotus latebrosus (Walker, 1859)		37.Carebara deponens (Walker, 1859)	78.Harpegnathos saltator taprobanae Forel, 1909
	6.Gnamptogenys sinhala Lattke, 2016	12.Camponotus mendax integer Forel, 1895		38.Carebara diversa taprobanae (Smith, 1858)	79.Hypoponera taprobanae (Forel, 1913)
		13.Camponotus ominosus Forel, 1911		39.Carebara escherichi (Forel, 1911)	80.Leptogenys exundans (Walker, 1859)
		14.Camponotus reticulatus yerburyi Forel, 1893		40.Carebara sinhala Fischer, Azorsa and Fisher, 2014	81.Leptogenys meritans (Walker, 1859)
		15.Camponotus sesquipedalis Roger, 1863		41.Crematogaster apicalis Motschoulsky, 1863	82.Pseudoneoponera rufipes ceylonensis (Forel, 1911)
		16.Camponotus simoni Emery, 1893		42.Crematogaster brunnescens Motschoulsky, 1863
		17.Camponotus variegatus intrans Forel, 1911		43.Crematogaster consternens (Walker, 1859)
		18.Camponotus wedda Forel, 1908		44.Crematogaster desecta Forel, 1911
		19.Myrmoteras ceylonicum Gregg, 1957		45.Crematogaster dohrni gigas Forel, 1913
		20.Nylanderia taylori levis (Forel, 1913)		46.Crematogaster pellens Walker, 1859
		21.Nylanderia vagabunda (Motschoulsky, 1863)		47.Crematogaster rogeri Emery, 1922
		22.Plagiolepis pissina Roger, 1863		48.Crematogaster rothneyi haputalensis Forel, 1913
		23.Polyrhachis bugnioni Forel, 1908		49.Dilobocondyla didita (Walker, 1859)
		24.Polyrhachis convexa isabellae Forel, 1908		50.Meranoplus boltoni Schödl, 1998
		25.Polyrhachis gibbosa Forel, 1908		51.Meranoplus loebli Schödl, 1998
		26.Polyrhachis nigra Mayr, 1862		52.Metapone greeni Forel, 1911
		27.Polyrhachis sophocles Forel, 1908		53.Monomorium taprobanae Forel, 1913
		28.Polyrhachis tibialis pectita Santschi, 1928		54.Pheidole barreleti Forel, 1903
		29.Polyrhachis xanthippe Forel, 1911		55.Pheidole ceylonica (Motschoulsky, 1863)
		30.Polyrhachis yerburyi Forel, 1893		56.Pheidole diffidens (Walker, 1859)
				57.Pheidole gracilipes (Motschoulsky, 1863)
				58.Pheidole horni Emery, 1901
				59.Pheidole latinoda peradeniyae Forel, 1911
				60.Pheidole rugosa Smith, 1858
				61.Pheidole sulcaticeps vellicans Forel, 1911
				62.Pheidole templaria euscrobata Forel, 1913
				63.Pristomyrmex sinharaja Dias and Yamane, 2016
				64.Rhopalomastix escherichi Forel, 1911
				65.Stereomyrmex horni Emery, 1901
				66.Strumigenys inopinata (De Andrade, 1994)
				67.Strumigenys veddha De Andrade, 2007
				68.Tetramorium curvispinosum Mayr, 1897
				69.Tetramorium transversarium Roger, 1863
				70.Trichomyrmex emeryi laevior (Mayr, 1897)
				71.Trichomyrmex rogeri Mayr, 1865
				72.Tyrannomyrmex legatus Alpert, 2013
				73.Vollenhovia escherichi Forel, 1911

## Sheet: Invasive Species
Formicinae (2 species)	Myrmicinae (13 species)	Ponerinae (3 species)
Nylanderia vividula	Cardiocondyla emeryi	Hypoponera punctatissima
Paratrechina longicornis	Monomorium monomorium	Hypoponera ragusai
	Monomorium pharaonis	Leptogenys falcigera
	Monomorium subopacum
	Pheidole megacephala*
	Solenopsis geminata
	Strumigenys emmae
	Strumigenys membranifera
	Syllophopsis australica Tetramorium bicarinatum
	Tetramorium pacificum
	Tetramorium simillimum
	Tetramorium tonganum

## Sheet: Dubious Records
S.No.	Taxonomy	References	Explanation
	Amblyoponinae
1	Prionopelta nominata (Smith, 1871)	Chapman and Capco 1951: 27 (Ceylon)	Australian: Possible misidentification of Prionopelta kraepelini Forel, 1905
2	Stigmatomma testaceum (Motschoulsky, 1863)	Motschoulsky 1863: 15 (Ceylon)	This species is nomen nudum and thus its recollection is prevented due to a lack of sufficient description to identify the species
	Dolichoderinae
3	Chronoxenus myops (Forel, 1895)	Li-zhong 2006: 263 (Sri Lanka)	No specimen base to confirm distribution in Sri Lanka
4	Chronoxenus walshi (Forel, 1895)	Li-zhong 2006: 263 (Sri Lanka)	No specimen base to confirm distribution in Sri Lanka
5	Iridomyrmex chasei Forel, 1902	Forel 1908: 3 (Pattipola, Ceylon); Chapman and Capco 1951: 189 (Ceylon); Dias 2002: 19 (Sri Lanka)	Australian: disjunctive distribution, needs confirmation in Sri Lanka
6	Technomyrmex modiglianii Emery, 1900	Dias 2002: 19 (Sri Lanka)	Wrongly included for Technomyrmex elatior Forel, 1902
	Dorylinae
7	Aenictus aratus Wheeler and Chapman, 1930	Dias 2002: 17 (Sri Lanka); Rajan et al. 2006: 166 (Sri Lanka)	Australian: extra Australian specimens being referable to A. aitkenii (Shattuck, 2008)
8	Aenictus binghami Forel, 1900	Gunawardene et al. 2008: 79 (Sinharaja Forest Reserve); Gunawardene et al. 2012: 84 (Sinharaja Forest Reserve)	Unlikely in Sri Lanka
9	Cerapachys sulcinodis Emery, 1889	Li-zhong 2006: 263 (Sri Lanka); Dias and Rajapaksa 2016: 34 (Kurunegala)	No specimen base to confirm distribution in Sri Lanka
10	Dorylus laevigatus (Smith, 1857)	Dias et al. 2012: 17 (Sri Lanka); Dias and Rajapaksa 2016: 34 (Anuradhapura, Kurunegala, Polonnaruwa)	No specimen base to confirm distribution in Sri Lanka
	Formicinae
11	Camponotus albosparsus Bingham, 1903	Chapman and Capco 1951: 243 (Ceylon)	Unlikely in Sri Lanka
12	Camponotus angusticollis sanguinolentus Forel, 1895	Sheela 2008a: 11 (Sri Lanka)	No specimen base to confirm distribution in Sri Lanka
13	Camponotus horni Clark, 1930	Forel 1903a: 712 (Nalanda, Ceylon); Dias 2002: 18 (Sri Lanka)	Australian: disjunctive distribution, needs confirmation in Sri Lanka
14	Camponotus maculatus (Fabricius, 1782)	Dias 2006a: 50 (Sri Lanka)	No specimen base to confirm distribution in Sri Lanka
15	Camponotus mayri Forel, 1879	Li-zhong 2006: 264 (Sri Lanka)	Afrotropical: no specimen base to confirm distribution in Sri Lanka
16	Camponotus nirvanae Forel, 1893	AntWeb 2020 (Ceylon: CASENT0910542)	Forel (1893) did not list Ceylon as the type locality for any of the syntypes. Locality label seems ambiguous.
17	Camponotus sericeus peguensis Emery, 1895	Chapman and Capco 1951: 242 (Ceylon)	Unlikely in Sri Lanka
18	Camponotus sericeus sanguiniceps Donisthorpe, 1942	Chapman and Capco 1951: 242 (Ceylon)	Unlikely in Sri Lanka
19	Echinopla striata aciculata (Smith, 1858)	Chapman and Capco 1951: 284 (Ceylon)	Unlikely in Sri Lanka
20	Formica fuscicauda Motschoulsky, 1863	Motschoulsky 1863: 12 (Ceylon)	Incertae sedis in genus, unidentifiable
21	Formica subpicea Motschoulsky, 1863	Motschoulsky 1863: 12 (Ceylon)	Incertae sedis in genus, unidentifiable
22	Lepisiota modesta (Forel, 1894)	Dias and Kosgamage 2012: 61 (Anuradhapura, Polonnaruwa)	No specimen base to confirm distribution in Sri Lanka
23	Myrmoteras binghamii Forel, 1893	Dias 2006a: 50 (Sri Lanka); Gunawardene et al. 2008: 80 (Sinharaja Forest Reserve); Gunawardene et al. 2012: 84 (Sinharaja Forest Reserve)	Needs confirmation in Sri Lanka (Bui et al. 2013)
24	Paraparatrechina minutula (Forel, 1901)	Gunawardene et al. 2012: 83 (Sinharaja Forest Reserve)	Australian: disjunctive distribution, needs confirmation in Sri Lanka
25	Polyrhachis bellicosa Smith, 1859	Dias and Rajapaksa 2016: 35 (Anuradhapura, Colombo, Galle, Gampaha, Polonnaruwa, Ratnapura)	No specimen base to confirm distribution in Sri Lanka
26	Polyrhachis cingula Donisthorpe, 1947	AntWeb 2020: CASENT0912101 (Ceylon, Peradeniya)	This is a misidentification. Clearly the two specimens on Antweb do not show the same species and the individual from New Guinea is a type.
27	Polyrhachis hippomanes Smith, 1861	Dias 2002: 19 (Sri Lanka)	Wrongly included for Polyrhachis hippomanes ceylonensis Emery, 1893
28	Polyrhachis moesta Emery, 1887	Li-zhong 2006: 271 (Sri Lanka)	No specimen base to confirm distribution in Sri Lanka
29	Polyrhachis spinigera Mayr, 1879	Emery 1893a: 254 (Kandy)	Probably a misidentification of Polyrhachis lacteipennis Smith, F., 1858. Emery (1901) listed P. lacteipennis as a denizen of Sri Lanka, without any reference to P. spinigera Mayr, 1879
30	Polyrhachis ypsilon Emery, 1887	Forel 1893c: 31 (Ceylon)	Needs confirmation in Sri Lanka (record absent in Kohout 2014)
31	Pseudolasius familiaris (Smith, 1860)	Gunawardene et al. 2008: 80 (Sinharaja Forest Reserve); Gunawardene et al. 2012: 84 (Sinharaja Forest Reserve)	Distribution in Sri Lanka seems far remote from the known distribution of this species in Asia
	Myrmicinae
32	Carebara affinis spinosior (Forel, 1911)	Forel 1913b: 662 (Nalanda)	Probably a misidentification. Needs further confirmation in Sri Lanka
33	Cardiocondyla nuda Mayr, 1866	Kugler 1984: 11 (Ceylon); Mathew and Tiwari 2000: 306 (Sri Lanka); Dias 2002: 18 (Sri Lanka); Tiwari et al. 2003: 492 (Sri Lanka); Dias 2006a: 51 (Sri Lanka); Ghosh et al. 2006: 386 (Sri Lanka); Li-zhong 2006: 265 (Sri Lanka); Rajan et al. 2006: 174 (Sri Lanka); Gunawardene et al. 2008: 81 (Sinharaja Forest Reserve); Amarasinghe 2010: 12 (Nawalapitiya); Dias et al. 2012: 15 (Sri Lanka); Dias and …	Misidentification of C. kagutsuchi (Seifert, 2003)
34	Crematogaster politula Forel, 1902	Dias et al. 2012: 15 (Sri Lanka); Dias and Rajapaksa 2016: 35 (Puttalam)	No specimen base to confirm distribution in Sri Lanka
35	Crematogaster treubi Emery, 1896	Dias 2002: 18 (Sri Lanka); Hosoishi and Ogata 2009: 62 (Sri Lanka)	No specimen base to confirm distribution in Sri Lanka
36	Lophomyrmex ambiguus Rigato, 1994	Sheela and Ghosh 2008 (Sri Lanka)	No specimen base to confirm distribution in Sri Lanka
37	Monomorium chinense Santschi, 1925	Li-zhong 2006: 268 (Sri Lanka)	No specimen base to confirm distribution in Sri Lanka
38	Monomorium salomonis (Linnaeus, 1758)	Magretti 1884: 540 (Ceylan)	Needs confirmation of distribution in Oriental region
39	Myrmecina curtisi Donisthorpe, 1949	Gunawardene et al. 2008: 81 (Sinharaja Forest Reserve)	Australian: possible misidentification of Myrmecina striata Emery, 1889
40	Myrmica obscurata Motschoulsky, 1863	Motschoulsky 1863: 16 (Ceylon)	Incertae sedis in genus, unidentifiable
41	Myrmica pilinodis Motschoulsky, 1863	Motschoulsky 1863: 16 (Ceylon)	Incertae sedis in genus, unidentifiable
42	Pheidole templaria Forel, 1902	Dias 2002: 17 (Sri Lanka); Dias 2006a: 52 (Sri Lanka); Dias et al. 2012: 16 (Sri Lanka)	Wrongly included for Pheidole templaria euscrobata
43	Rogeria sp.	Gunawardene et al. 2008: 75 (Sinharaja Forest Reserve); Gunawardene et al. 2010: 558 (Sinharaja Forest Reserve)	Probably a misidentification. The genus is known only from the Nearctic, Neotropical and Oceanian realms
44	Strumigenys lewisi Cameron, 1886	Forel 1903a: 707 (Ceylon); Emery 1897b: 574 (Ceylon)	Unlikely in Sri Lanka
45	Tetramorium flavipes Emery, 1893	Chapman and Capco 1951: 180 (Ceylon)	Unlikely in Sri Lanka
46	Tetramorium guineense (Bernard, 1953)	Forel 1911a: 225 (Seenigoda); Dias, 2002: 18 (Sri Lanka).	Should be Tetramorium bicarinatum (Bolton, 1977)
47	Tetramorium nodiferum (Emery, 1901)	Emery 1912: 104 (Ceylon).	Afrotropical: disjunctive distribution, needs confirmation in Sri Lanka
48	Trichomyrmex emeryi (Mayr, 1895)	Dias 2002: 18 (Sri Lanka).	Wrongly included for Trichomyrmex emeryi laevior (Mayr, 1897)
	Ponerinae
49	Diacamma geometricum (Smith, 1857)	Li-zhong 2006: 266 (Sri Lanka)	No specimen base to confirm distribution in Sri Lanka. Reported so far from SE Asia only (Laciny et al. 2015)
50	Diacamma rugosum celebense Emery, 1887	Emery 1897a: 156 (Ceylon); Forel 1900c: 319 (Ceylon)	Probably a misidentification. Needs confirmation of distribution in Sri Lanka
51	Diacamma vagans (Smith, 1860)	Emery 1887d: 440 (Pointe de Galle, Ceylon); Mukherji and Ribeiro, 1925: 205 (Ceylon); Chapman and Capco 1951: 59 (Ceylon); Ali 1991: 3 (Sri Lanka); Tiwari 1999: 25 (Sri Lanka)	Could be a different species (Laciny et al. 2015)
52	Hypoponera truncata (Smith, 1860)	Gunawardene et al. 2008: 83 (Sinharaja Forest Reserve)	Personal Communication Barry Bolton 2 July 2012
53	Odontomachus haematodus (Linnaeus, 1758)	Emery 1893a: 243 (Kandy, Colombo, Nuwara-Eliya); Emery 1901: 113 (Ceylon); Emery 1911: 114 (Ceylon); Forel 1900a: 58 (Ceylon); Forel 1908: 2 (Puwakpitiya, Galle); Forel 1911a: 215 (Ceylon); Viehmeyer 1912: 18 (Ceylon); Karavaiev 1926: 417 (Kandy, Ceylon); Chapman and Capco 1951: 43 (Ceylon); Ali 1991: 4 (Sri Lanka); Tiwari 1999: 21 (Sri Lanka); Mathew and Tiwari 2000: 289 (Sri Lanka); Dias 2002: …	Should be Odontomachus simillimus
54	Odontomachus monticola Emery, 1892	Li-zhong 2006: 269 (Sri Lanka).	No specimen base to confirm distribution in Sri Lanka
55	Odontoponera transversa (Smith, 1857)	Li-zhong 2006: 269 (Sri Lanka).	No specimen base to confirm distribution in Sri Lanka
	Pseudomyrmecinae
56	Tetraponera aitkenii (Forel, 1902)	Ali 1992: 1 (Sri Lanka); Tiwari 1999: 34 (Sri Lanka); Dias 2002: 17 (Sri Lanka)	Personal Communication Phil Ward 18 August 2015
57	Tetraponera attenuata Smith, 1877	Gunawardene et al. 2008: 83 (Sinharaja Forest Reserve); Gunawardene et al. 2012: 83 (Sinharaja Forest Reserve).	Personal Communication Phil Ward 18 August 2015
58	Tetraponera difficilis (Emery, 1900)	Gunawardene et al. 2008: 83 (Sinharaja Forest Reserve).	Personal Communication Phil Ward 18 August 2015
